# Supplementary material for: A biomimetic microfluidic model to study signalling between endothelial and vascular smooth muscle cells under hemodynamic conditions
Source: PubMed Central journal article supplement — Lab Chip. 2018 May 14;18(11):1607–20. doi: 10.1039/c8lc00286j (PMC5972738; doi:10.1039/c8lc00286j), 2018-05-14
Supplement: LC-018-C8LC00286J-s001.pdf [file LC-018-C8LC00286J-s001.pdf]

**Title: A biomimetic microfluidic model to study signalling between endothelial and vascular smooth muscle cells under hemodynamic conditions**

**Running title: Micromimick of the hemodynamic EC-VSMC signalling niche**

Nicole C.A. van Engeland<sup>1,2\*</sup>, Andreas M.A.O. Pollet<sup>1,4</sup>, Jaap M.J. den Toonder<sup>3,4</sup>, Carlijn V.C. Bouten<sup>1,3</sup>, Oscar M.J.A. Stassen<sup>1,2,3</sup>, Cecilia M. Sahlgren<sup>1,2,3</sup>

Eindhoven University of Technology<sup>1</sup>, Department of Biomedical Engineering, Soft Tissue Engineering and Mechanobiology (STEM), 5600 MB Eindhoven, the Netherlands; Åbo Akademi University<sup>2</sup>, Faculty of Science and Engineering, Molecular Biosciences, Turku, Finland; Eindhoven University of Technology<sup>3</sup>, Institute for Complex Molecular Systems (ICMS), 5600 MB Eindhoven, The Netherlands; Eindhoven University of Technology<sup>4</sup>, Microsystems Group, Department of Mechanical Engineering, 5600 MB Eindhoven, the Netherlands

\*Address for correspondence:

Nicole van Engeland

Tel no: +31 40 247 3047

E-mail: [n.c.a.v.engeland@tue.nl](mailto:n.c.a.v.engeland@tue.nl)

**Supplemental table/figures**

**Supplemental Table 1. Primer sequences used for qPCR.**

| Target                               | Primer sequence (5' to 3') |                            |
|--------------------------------------|----------------------------|----------------------------|
| <i>Smooth muscle markers</i>         |                            |                            |
| <b>α-SMA</b>                         | FW=CGTGTTGCCCTGAAGAGCAT    | RV=ACCGCCTGGATAGCCACATACA  |
| <b>Calponin</b>                      | FW=TGAAGTACGCAGAGAAGCAG    | RV=CAGCTTGGGGTCGTAGAG      |
| <b>Smoothelin</b>                    | FW=CAGCCCAGAACCGAGAGTC     | RV=AGCAGCCATAGGAGAATCAGAT  |
| <b>Connexin43</b>                    | FW=TTTCTTCAAGGGCGTTAAGGATC | RV=AGGAGGAGACATAGGCGAGAG   |
| <i>Endothelial markers</i>           |                            |                            |
| <b>CD31</b>                          | FW=AAGGAACAGGAGGGAGAGTATTA | RV=GTATTTTGCTTCTGGGGACACT  |
| <b>VWF</b>                           | FW=CCGATGCAGCCTTTTCGGA     | RV=TCTGGAAGTCCCAATAATCGAG  |
| <i>Extracellular protein markers</i> |                            |                            |
| <b>FN</b>                            | FW=AAGACCAGCAGAGGCATAAAGG  | RV=CACTCATCTCCAACGGCATAATG |
| <b>COL1</b>                          | FW=TGGCTCTCCTGGTGAACAAG    | RV=GCCAGGGAGACCGTTGAG      |
| <b>COL3</b>                          | FW=ATCTTGGTCAGTCCTATGC     | RV=TGGAATTTCTGGGTTGGG      |

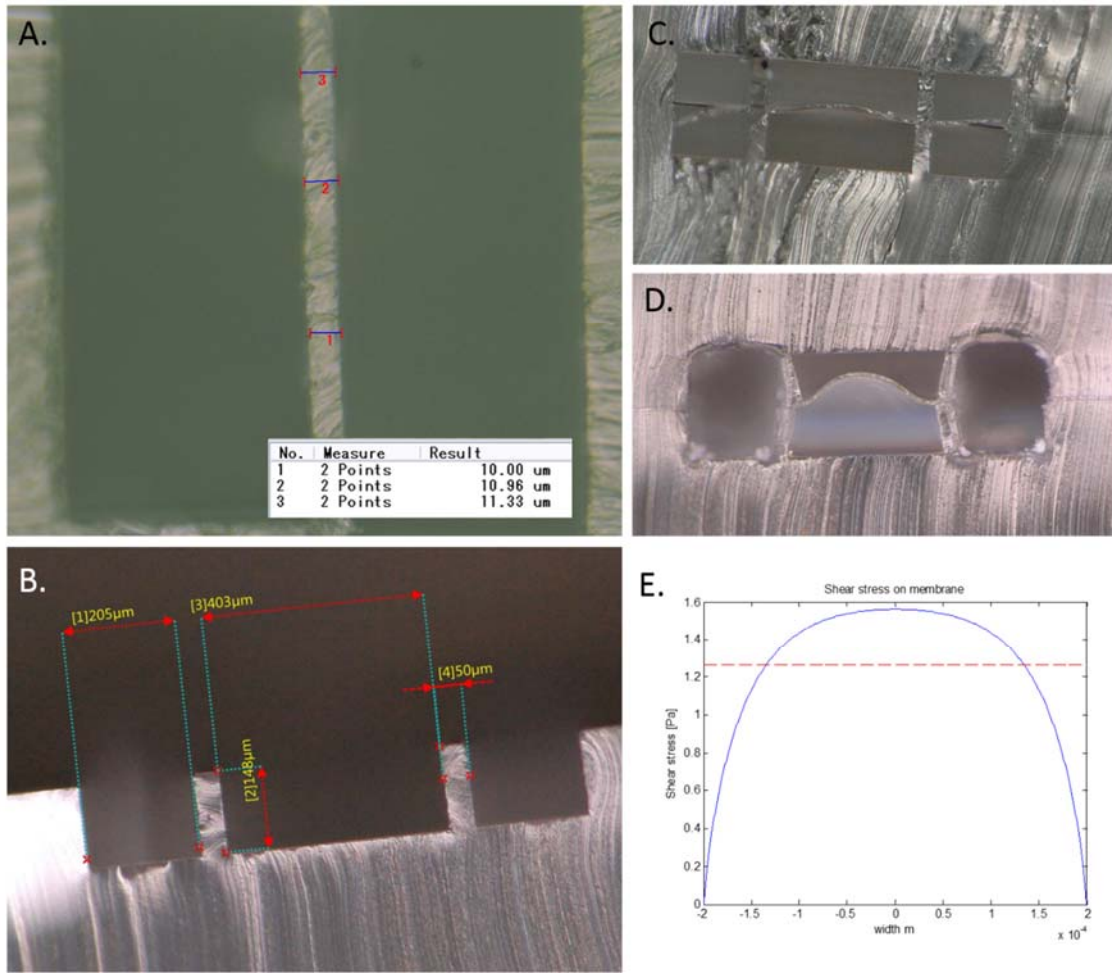

**Supplemental Figure 1.** A. PDMS membrane thickness measurements. B. Measurements of the dimensions of a cross-section of the device half. C. Cross-section of the device before etching. D. Cross-section of the device after etching. E. Shear stress profile on the porous membrane. On the y-axis the shear stress experiences in Pa, at the x-axis the width of the cell culture channel.

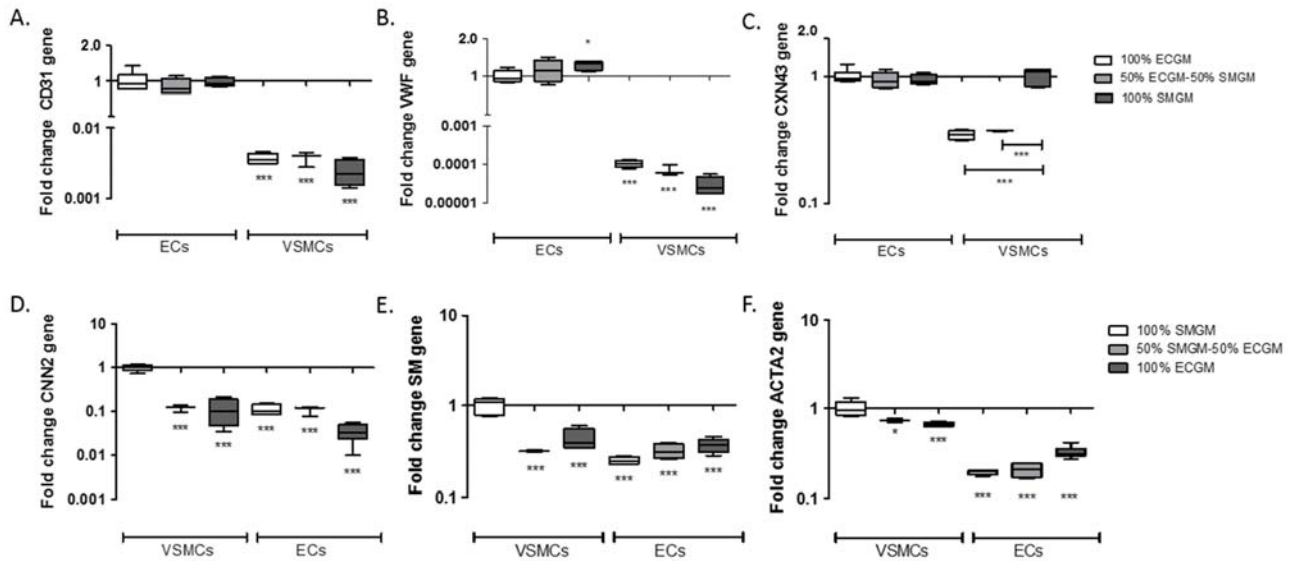

**Supplemental Figure 2. Gene expression analysis for different types of medium.** Expression of endothelial markers *CD31* (A) and *VWF* (B), *CNX43* (C), and smooth muscle markers *CNN2* (D), *SM* (E) and *ACTA2* (F). ECs indicates ECs cultured on PDMS coated with FN (PDMS-FN) surfaces; VSMCs, VSMCs cultured on PDMS-FN surfaces; Cells were cultured with different types of medium, 100% smooth muscle growth medium (100% SMGM), 100% endothelial growth medium (100% ECGM) and 50% SMGM - 50% ECGM. For the endothelial markers, \* $p < 0.05$ , \*\* $p < 0.01$ , \*\*\* $p < 0.001$  on each bar for comparison with the control ECs with 100% ECGM. For smooth muscle markers, \* $p < 0.05$ , \*\* $p < 0.01$ , \*\*\* $p < 0.001$  on each bar for comparison with control VSMCs with 100% SMGM. \* $p < 0.05$ , \*\* $p < 0.01$ , \*\*\* $p < 0.001$  on the lines for comparison between groups,  $n = 4-6$ .

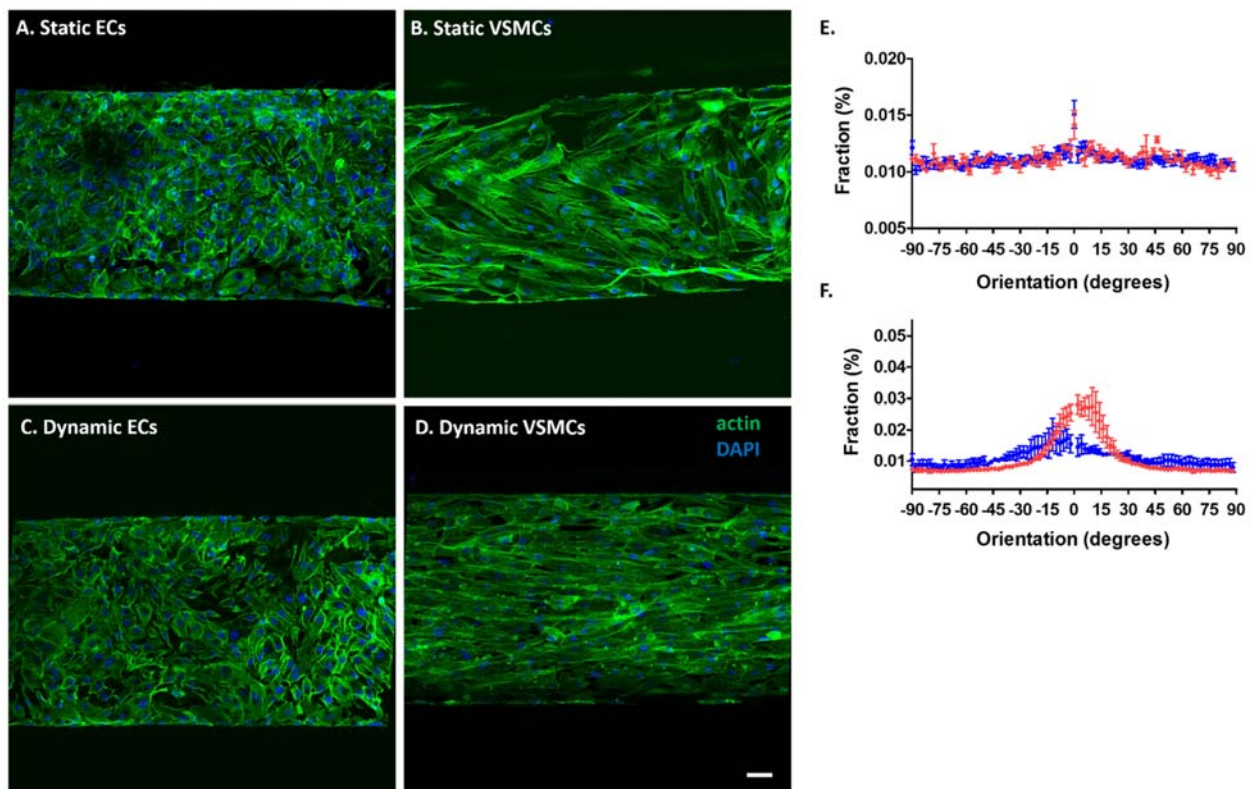

**Supplemental Figure 3. Cell and nucleus orientation.** A-D. Immunofluorescent staining of F-Actin (green) and DAPI (blue) for ECs static (A) and dynamic (C) and VSMCs static (B) and dynamic (D). Scalebar represents 50  $\mu\text{m}$ . E and F. Nucleus orientation for ECs (E) and VSMCs (F) in static (blue) and dynamic (red) cultures.
